# Supplementary material for: Impact of clinical registries on quality of patient care and health outcomes: protocol for a systematic review
Source: PubMed Central journal article supplement — BMJ Open. 2016 Apr 26;6(4):e010654. doi: 10.1136/bmjopen-2015-010654 (PMC4853981; doi:10.1136/bmjopen-2015-010654), 2016-04-26
Supplement: bmjopen-2015-010654supp1.pdf [file bmjopen-2015-010654supp1.pdf]

Database(s): **Ovid MEDLINE(R)** Search Strategy:

| #  | Searches                                                                                                                                                                                                                                                                                                                                                                                                                                                                                                                                                                                                                                                                                                                                                                                                                                                           | Results      |
|----|--------------------------------------------------------------------------------------------------------------------------------------------------------------------------------------------------------------------------------------------------------------------------------------------------------------------------------------------------------------------------------------------------------------------------------------------------------------------------------------------------------------------------------------------------------------------------------------------------------------------------------------------------------------------------------------------------------------------------------------------------------------------------------------------------------------------------------------------------------------------|--------------|
| 1  | exp Registries/                                                                                                                                                                                                                                                                                                                                                                                                                                                                                                                                                                                                                                                                                                                                                                                                                                                    | 64124        |
| 2  | (register*1 or registry or registries).tw.                                                                                                                                                                                                                                                                                                                                                                                                                                                                                                                                                                                                                                                                                                                                                                                                                         | 105933       |
| 3  | 1 or 2                                                                                                                                                                                                                                                                                                                                                                                                                                                                                                                                                                                                                                                                                                                                                                                                                                                             | 131997       |
| 4  | "quality of health care"/ or clinical competence/ or guideline adherence/ or patient outcome assessment/ or "process assessment (health care)"/ or benchmarking/ or medical audit/ or nursing audit/ or total quality management/ or risk adjustment/ or "standard of care"/ or "patient acceptance of health care"/ or patient compliance/ or medication adherence/ or patient participation/ or patient satisfaction/ or patient preference/ or direct service costs/ or drug costs/ or hospital costs/ or accountable care organizations/ or health expenditures/ or health priorities/ or health care rationing/ or health facility closure/ or health facility environment/ or health facility size/ or healthcare disparities/ or needs assessment/ or secondary care/ or tertiary healthcare/ or uncompensated care/ or comparative effectiveness research/ | 436035       |
| 5  | exp morbidity/ or exp mortality/                                                                                                                                                                                                                                                                                                                                                                                                                                                                                                                                                                                                                                                                                                                                                                                                                                   | 687134       |
| 6  | ("quality of health care" or "quality of healthcare" or quality care or care quality).tw.                                                                                                                                                                                                                                                                                                                                                                                                                                                                                                                                                                                                                                                                                                                                                                          | 15197        |
| 7  | (benchmarking or medical audit or nursing audit or total quality management or risk adjustment or "standard of care").tw.                                                                                                                                                                                                                                                                                                                                                                                                                                                                                                                                                                                                                                                                                                                                          | 26793        |
| 8  | ("patient acceptance of health care" or patient compliance or medication adherence or patient participation or patient satisfaction or patient preference).tw.                                                                                                                                                                                                                                                                                                                                                                                                                                                                                                                                                                                                                                                                                                     | 34334        |
| 9  | (direct service costs or drug costs or hospital costs or accountable care organizations or health expenditures or health priorities or health care rationing or health facility closure or health facility environment or health facility size).tw.                                                                                                                                                                                                                                                                                                                                                                                                                                                                                                                                                                                                                | 8648         |
| 10 | (healthcare disparities or needs assessment or clinical competence or guideline adherence or patient outcome assessment or process assessment).tw.                                                                                                                                                                                                                                                                                                                                                                                                                                                                                                                                                                                                                                                                                                                 | 5792         |
| 11 | (secondary care or tertiary healthcare or uncompensated care or comparative effectiveness research).tw.                                                                                                                                                                                                                                                                                                                                                                                                                                                                                                                                                                                                                                                                                                                                                            | 4993         |
| 12 | (Mortality or Morbidity).tw.                                                                                                                                                                                                                                                                                                                                                                                                                                                                                                                                                                                                                                                                                                                                                                                                                                       | 577809       |
| 13 | or/4-12                                                                                                                                                                                                                                                                                                                                                                                                                                                                                                                                                                                                                                                                                                                                                                                                                                                            | 1559176      |
| 14 | 3 and 13                                                                                                                                                                                                                                                                                                                                                                                                                                                                                                                                                                                                                                                                                                                                                                                                                                                           | 55302        |
| 15 | (randomized controlled trial or controlled clinical trial).pt.                                                                                                                                                                                                                                                                                                                                                                                                                                                                                                                                                                                                                                                                                                                                                                                                     | 488176       |
| 16 | case-control studies/ or retrospective studies/ or cohort studies/ or longitudinal studies/ or follow-up studies/ or prospective studies/ or cross-sectional studies/                                                                                                                                                                                                                                                                                                                                                                                                                                                                                                                                                                                                                                                                                              | 1795417      |
| 17 | 15 or 16                                                                                                                                                                                                                                                                                                                                                                                                                                                                                                                                                                                                                                                                                                                                                                                                                                                           | 2158334      |
| 18 | 14 and 17                                                                                                                                                                                                                                                                                                                                                                                                                                                                                                                                                                                                                                                                                                                                                                                                                                                          | 24617        |
| 19 | exp animals/ not humans.sh.                                                                                                                                                                                                                                                                                                                                                                                                                                                                                                                                                                                                                                                                                                                                                                                                                                        | 4171020      |
| 20 | 18 not 19                                                                                                                                                                                                                                                                                                                                                                                                                                                                                                                                                                                                                                                                                                                                                                                                                                                          | 24612        |
| 21 | limit 20 to english language                                                                                                                                                                                                                                                                                                                                                                                                                                                                                                                                                                                                                                                                                                                                                                                                                                       | 23430        |
| 22 | limit 21 to yr="1980 - 2014"                                                                                                                                                                                                                                                                                                                                                                                                                                                                                                                                                                                                                                                                                                                                                                                                                                       | <b>22235</b> |
